# Supplementary material
Source: HighWire-hosted journal article supplement (https://jitc.bmj.com/content/10/6/e004280)

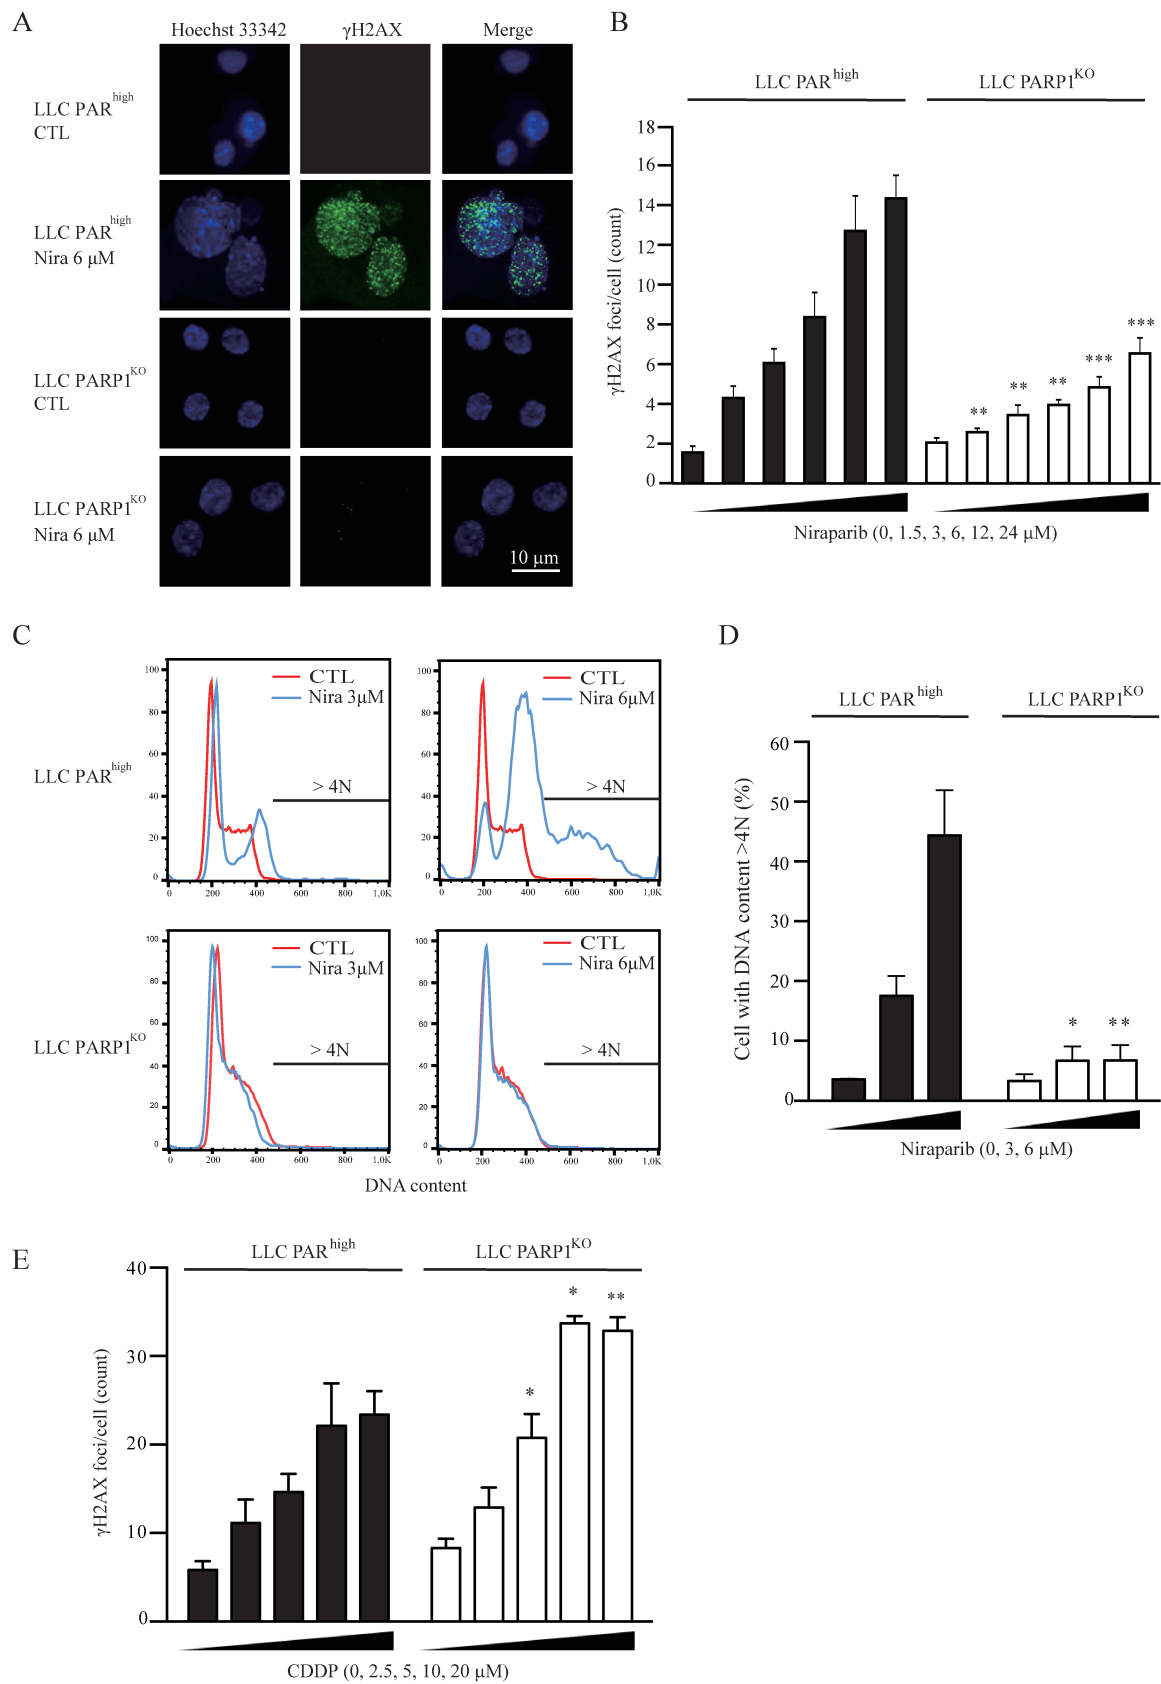

Supplemental Figure 11

Supplement: inline-supplementary-material-11 [file inline-supplementary-material-11.pdf]

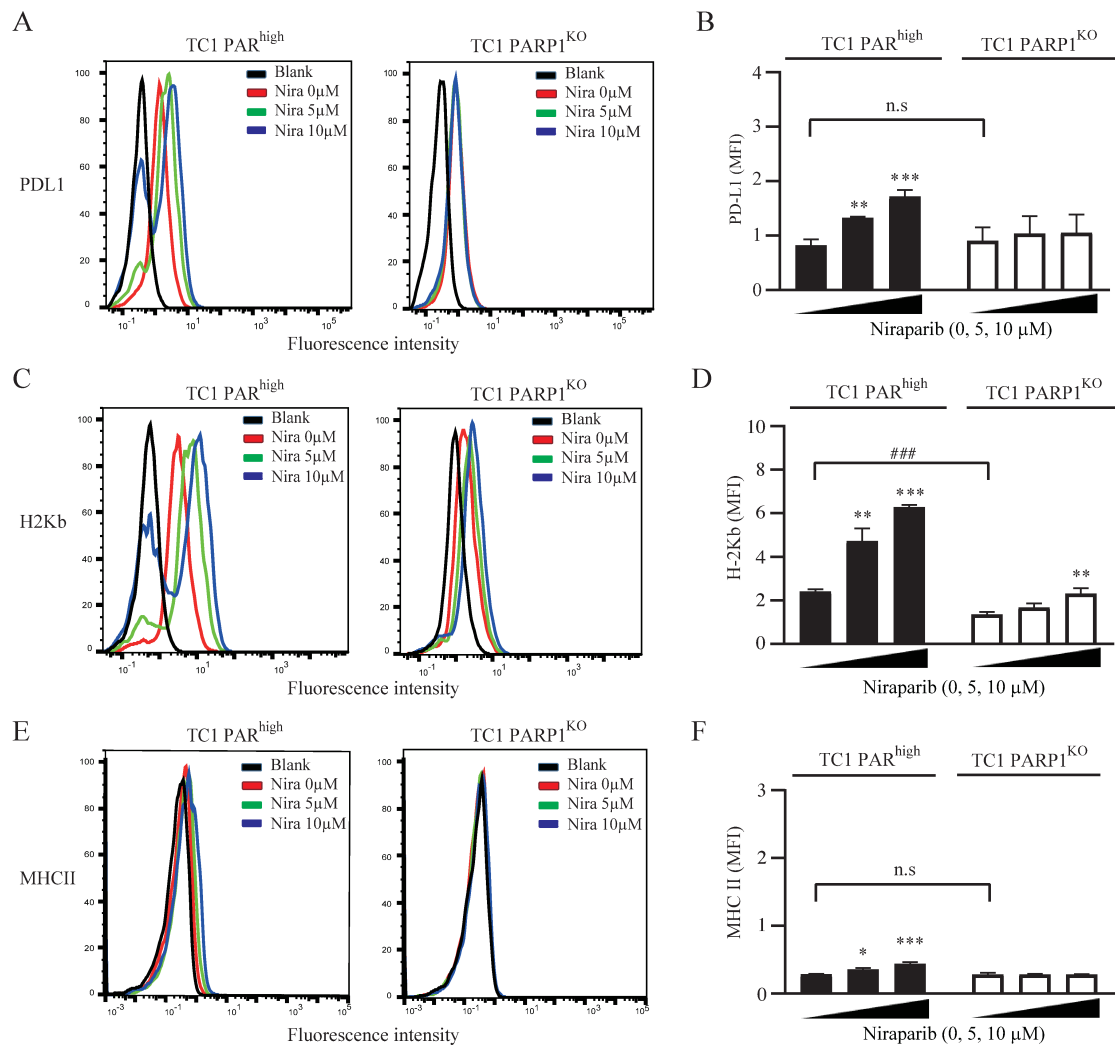

Supplemental figure 14

Supplement: inline-supplementary-material-14 [file inline-supplementary-material-14.pdf]
